# Supplementary material for: Designing Thiadiazoloquinoxaline-Based Conjugated Polymers for Efficient Organic Photovoltaics: A DFT/TDDFT Study
Source: MDPI journal article supplement (doi:10.3390/molecules29071580), 2024-04-01
Supplement: s1 [file s1]

## Supplementary Material

### Designing Thiadiazoloquinoxaline-Based Conjugated Polymers for Efficient Organic Photovoltaics: A DFT/TDDFT Study

*Taylor A. Dorlus 1, Juganta K. Roy 1,2 and Jerzy Leszczynski 1,\**

*1 Interdisciplinary Center for Nanotoxicity, Jackson State University,  
Jackson, MS 39217, USA; taylor.dorlus@icnanotox.org (T.A.D.); jroy@wtamu.edu (J.K.R.)*

*2 Clean Energy Materials Modeling Laboratory, Department of Chemistry and Physics,  
West Texas A&M University, Canyon, TX 79016, USA*

*\* Correspondence: jerzy@icnanotox.org*

**Table S1.** Computed at the level of theory B3LYP/6-311G(d,p) for ground state and B3LYP/6-311G(d,p)// CAM-B3LYP/6-311G(d,p) for TDDFT calculations. As we found that atactic and syndiotactic oligomers not affecting DFT and TDDFT results significantly (see Figure 1a), here we reported the results of syndiotactic oligomers.

| <i>Name</i> | <i>n</i> | $E_{HOMO}$<br>(eV) | $E_{LUMO}$<br>(eV) | $E_{gap}$<br>(eV) | $E_{abs}/\lambda_{max}$<br>(eV/nm) | $E_b$<br>(eV) | $\mu_D$<br>Debye | <i>f</i> | $S_0 \rightarrow S_1$<br>(major<br>contributions) |
|-------------|----------|--------------------|--------------------|-------------------|------------------------------------|---------------|------------------|----------|---------------------------------------------------|
| <b>ref</b>  | 1        | -5.09              | -3.13              | 1.96              | 2.12/585.95                        | 0.16          | 2.92             | 0.452    | H $\rightarrow$ L (95.8%)                         |
|             | 2        | -4.62              | -3.35              | 1.27              | 1.46/851.69                        | 0.19          | 6.87             | 1.267    | H $\rightarrow$ L (90.1%)                         |
|             | 3        | -4.44              | -3.44              | 1.00              | 1.24/999.11                        | 0.24          | 6.65             | 2.312    | H $\rightarrow$ L (82.7%)                         |
|             | 4        | -4.35              | -3.49              | 0.86              | 1.12/1110.90                       | 0.28          | 7.38             | 3.363    | H $\rightarrow$ L (75.7%)                         |
|             | 5        | -4.29              | -3.55              | 0.74              | 0.98/1262.60                       | 0.24          | 8.58             | 4.449    | H $\rightarrow$ L (71.4%)                         |
|             | $\infty$ |                    |                    | 0.52              |                                    |               |                  |          |                                                   |

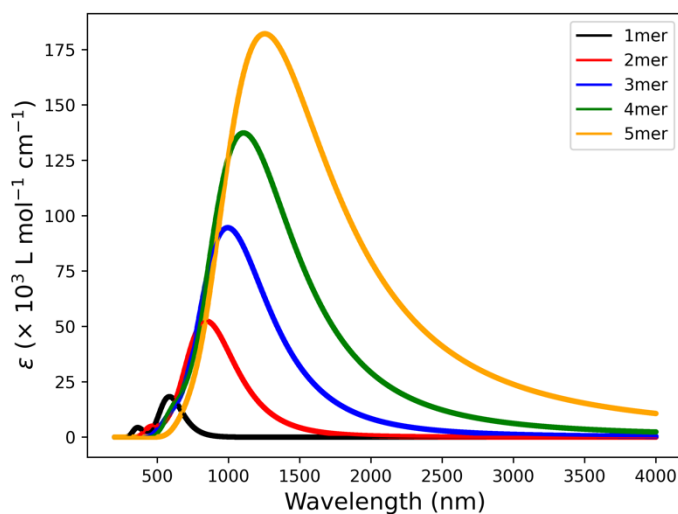

**Figure S1.** Simulated UV-vis absorption spectra of the reference oligomer.

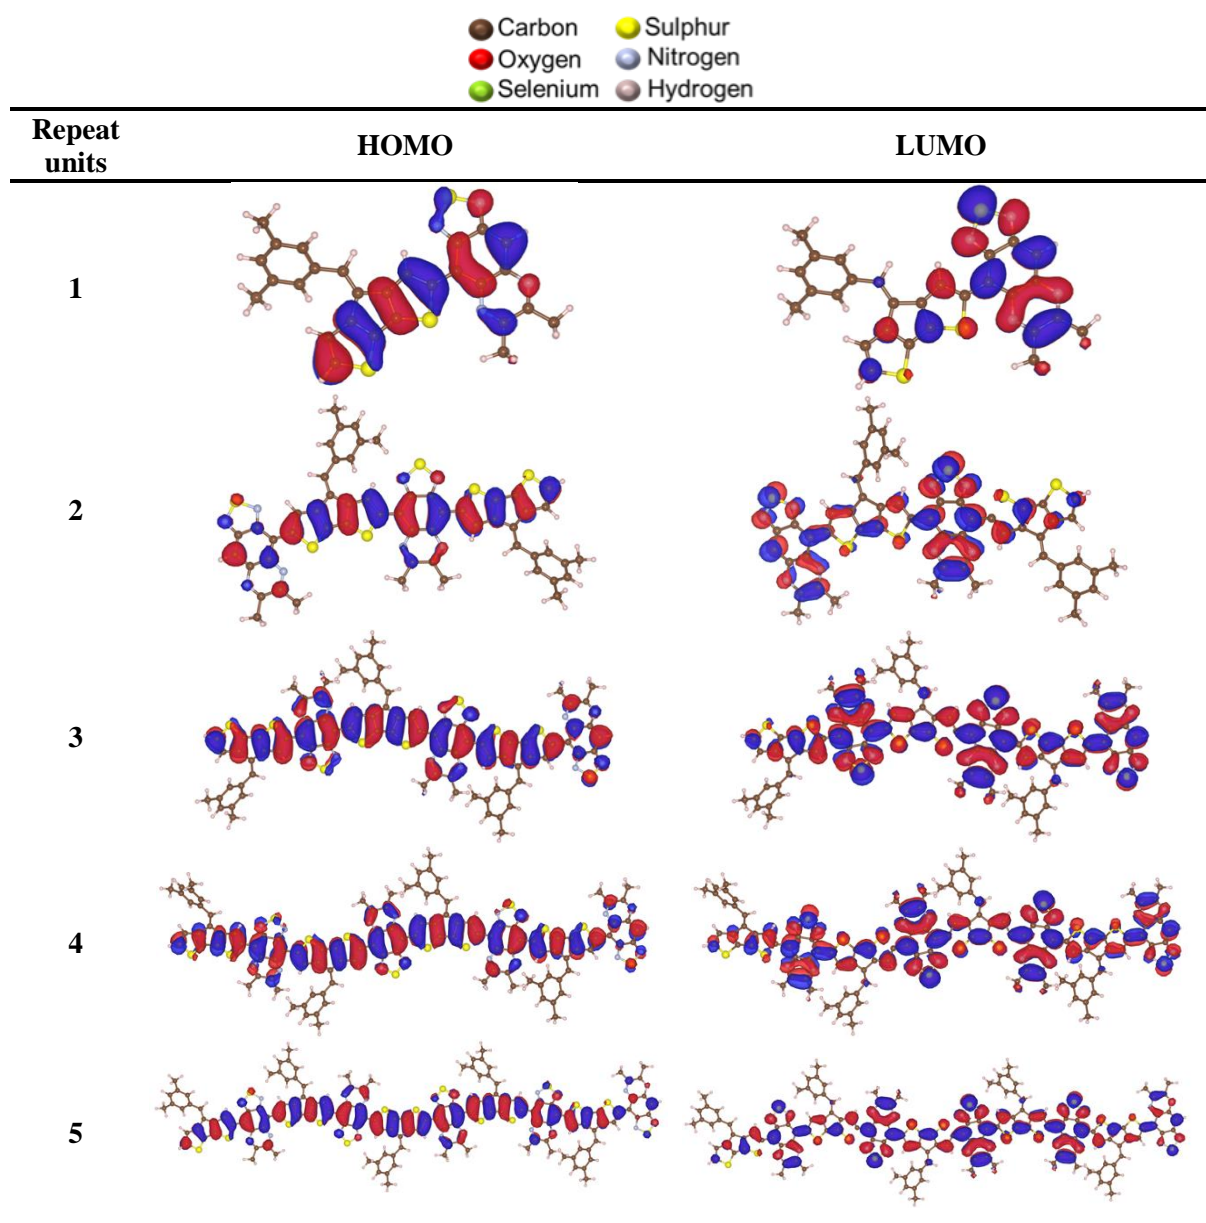

**Figure S2.** Electron density distribution of the reference oilgomer with iso value= 0.01 au.

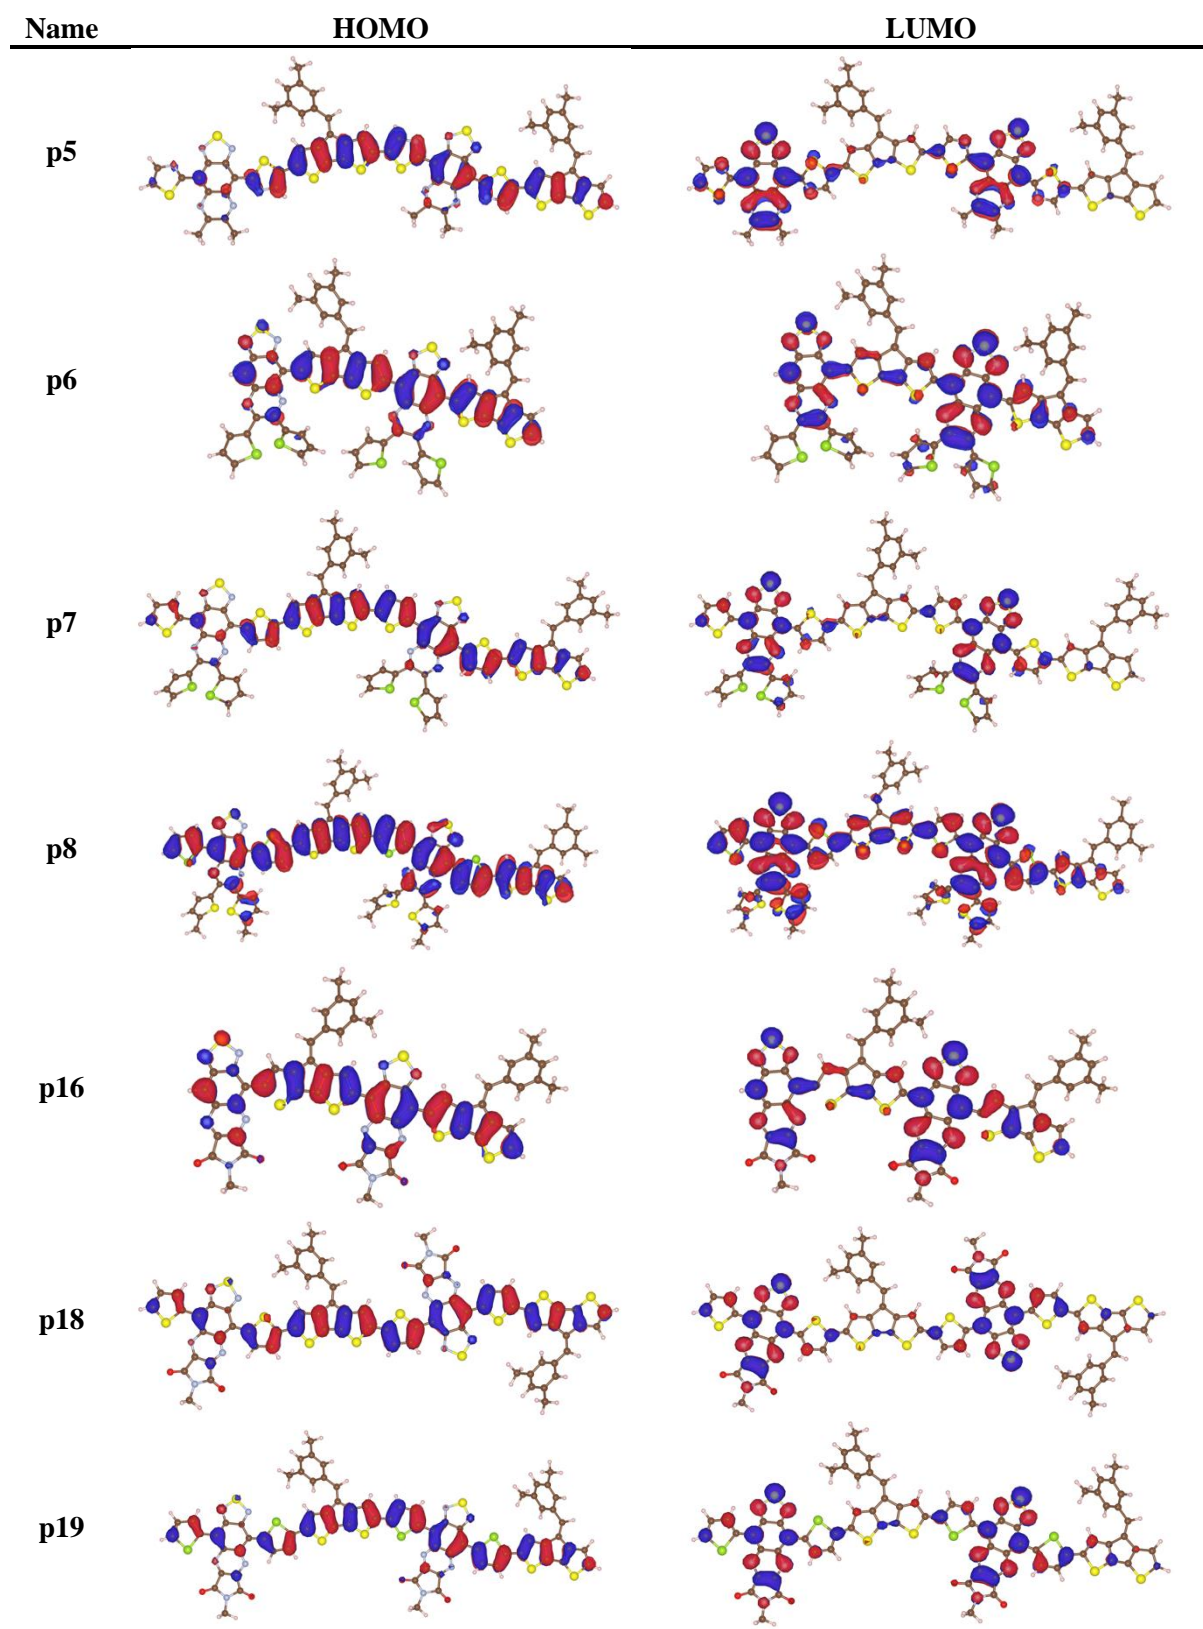

**Figure S3.** Electron density distribution of the designed oligomers, in this figure dimers are depicted.

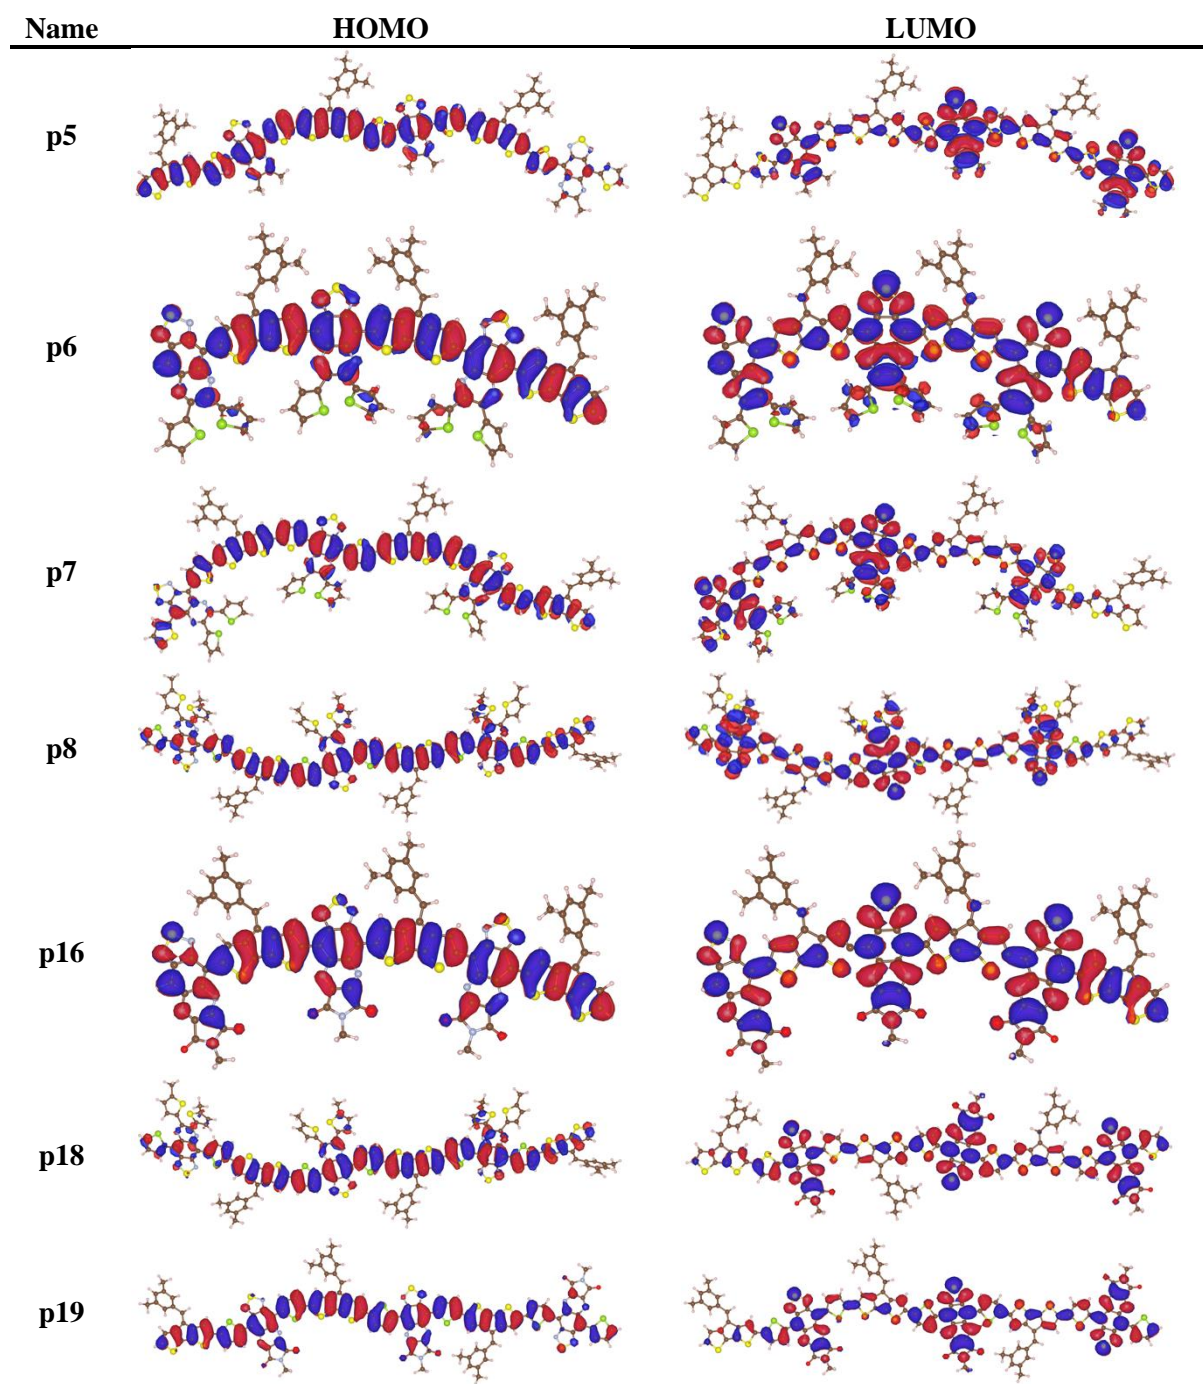

**Figure S4.** Electron density distribution of the designed oligomers, in this figure trimers are depicted.



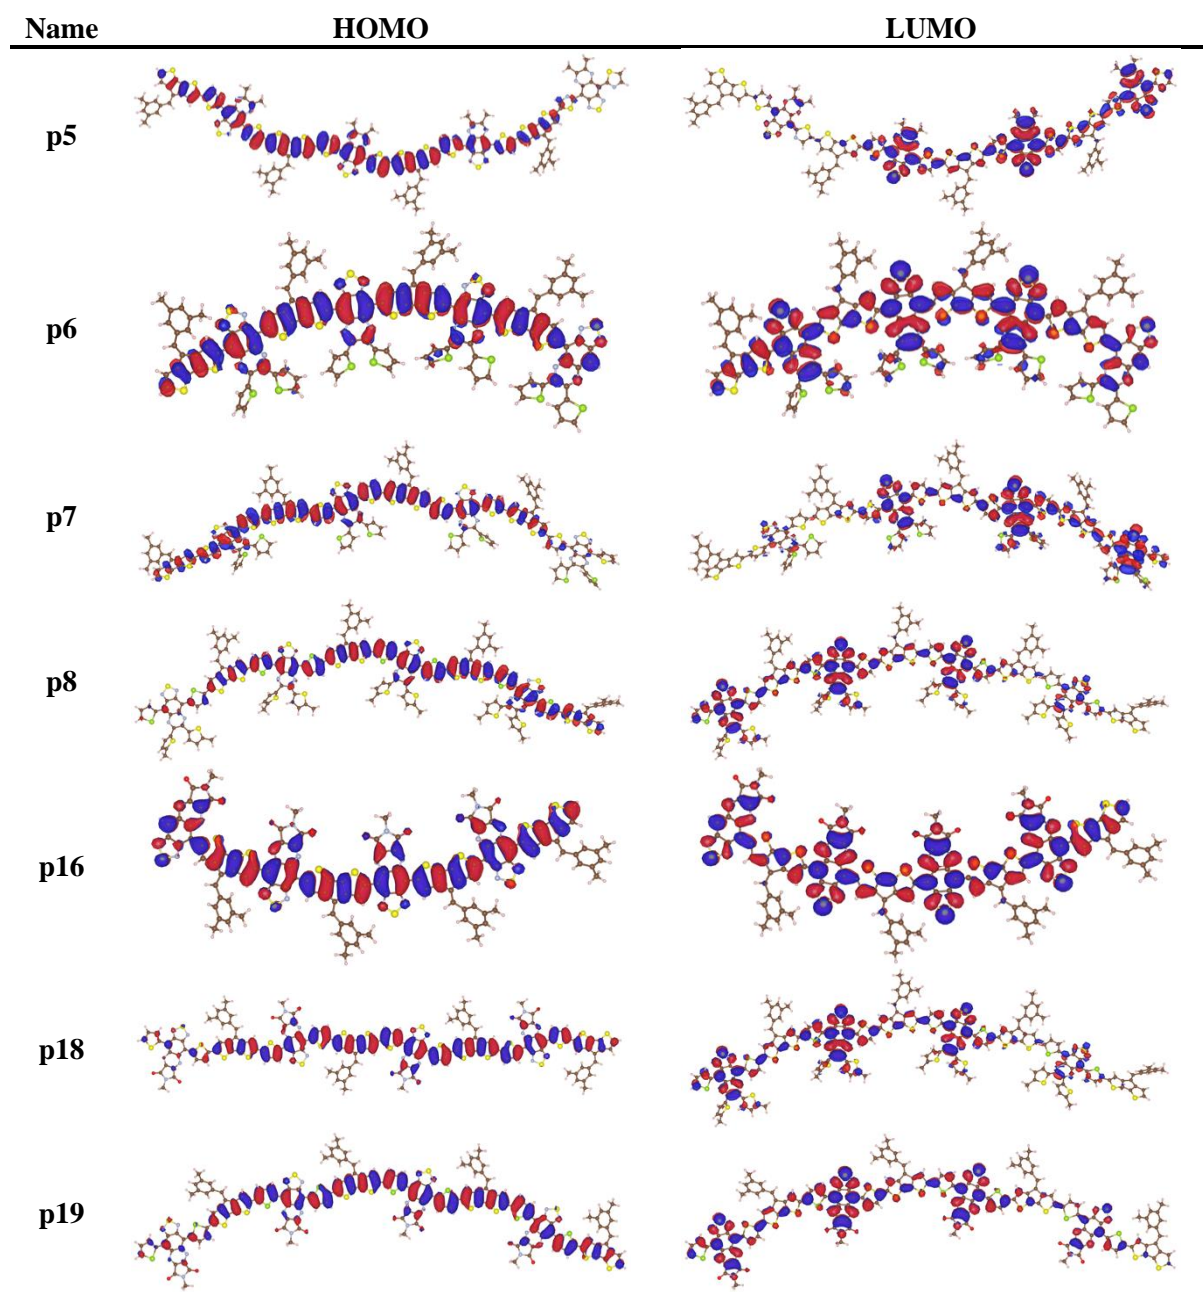

**Figure S5.** Electron density distribution of the designed oligomers, in this figure tetramers are depicted.

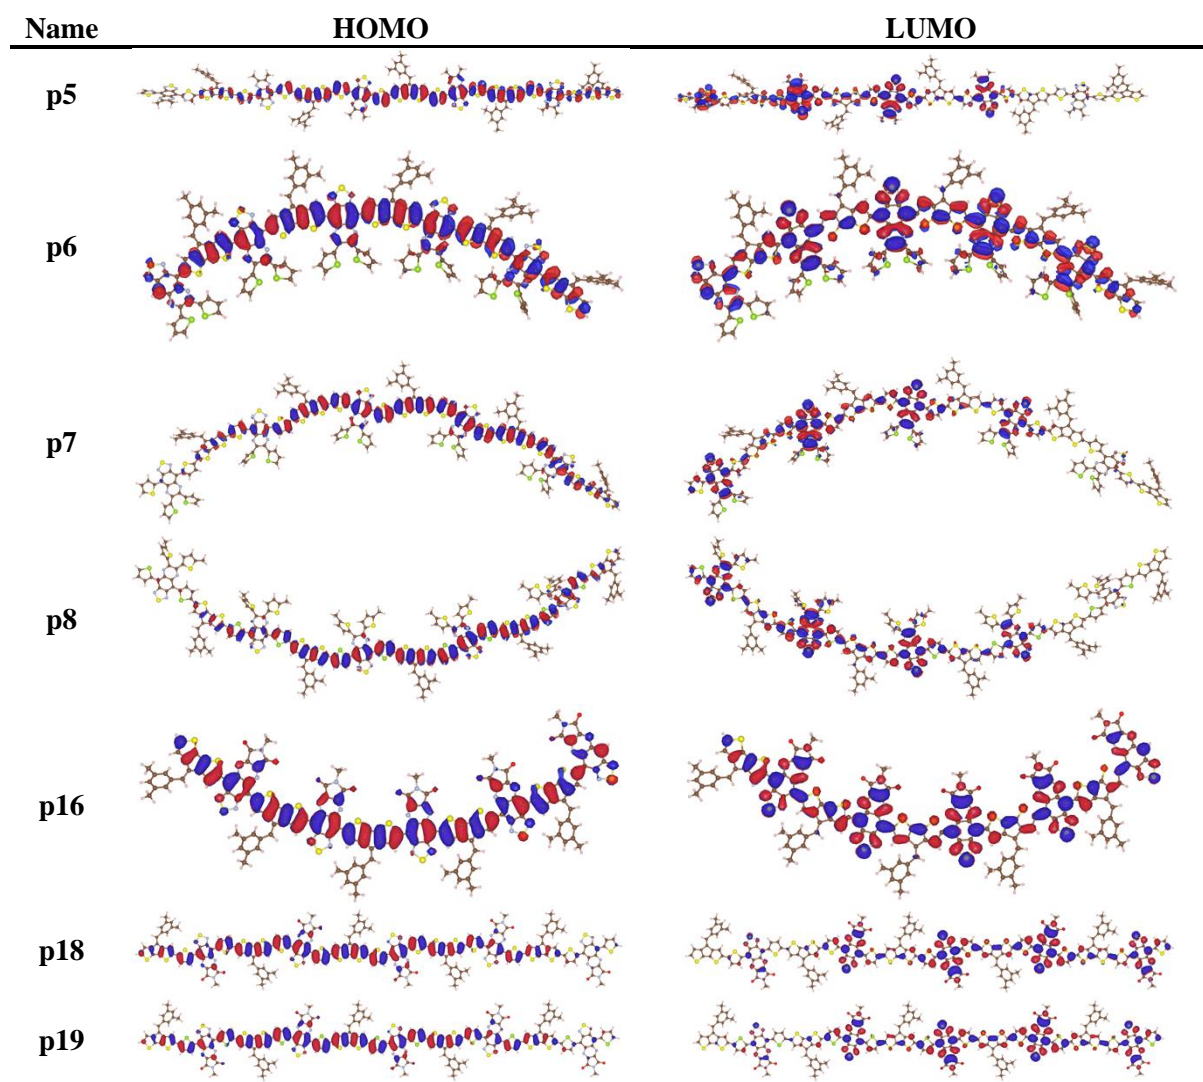

**Figure S6.** Electron density distribution of the designed oligomers, in this figure pentamers are depicted.

Table S2. XYZ coordinates of the ground state geometry of the studied monomers.

| p05  |           |           |          |
|------|-----------|-----------|----------|
| Atom | X         | Y         | Z        |
| C    | -4.269547 | 1.517282  | -0.20601 |
| C    | -2.922069 | 0.950391  | -0.21287 |
| C    | -3.819559 | -1.250518 | 0.085385 |
| C    | -5.155525 | -0.697239 | 0.032432 |
| C    | -5.424072 | 0.676459  | -0.1365  |
| N    | -1.961419 | 1.879539  | -0.29618 |
| N    | -4.261461 | 2.856377  | -0.2713  |
| S    | -2.708942 | 3.329619  | -0.34096 |
| N    | -6.225112 | -1.544667 | 0.140597 |
| N    | -3.658148 | -2.574557 | 0.386661 |
| C    | -6.040491 | -2.816734 | 0.349705 |
| C    | -4.699546 | -3.342343 | 0.526869 |
| C    | 3.387572  | -0.4089   | -0.08993 |
| C    | 4.748668  | -0.787714 | -0.02859 |
| C    | 4.914334  | -2.171139 | -0.11801 |
| S    | 3.418342  | -3.014823 | -0.2362  |
| C    | 6.315911  | -2.480477 | -0.16827 |
| C    | 7.032428  | -1.291525 | -0.12096 |
| C    | 6.089952  | -0.157329 | -0.01695 |
| C    | 6.47792   | 1.137851  | 0.027378 |
| S    | 7.34608   | -3.862269 | -0.25412 |
| C    | 8.757141  | -2.827602 | -0.22579 |
| C    | 8.436868  | -1.499452 | -0.14894 |
| C    | 5.328909  | 4.708412  | -0.2832  |
| C    | 6.041918  | 3.523398  | -0.4494  |
| C    | 5.680991  | 2.350246  | 0.233474 |
| C    | 4.611577  | 2.40228   | 1.13819  |
| C    | 3.894031  | 3.582286  | 1.342106 |
| C    | 4.25698   | 4.719305  | 0.615966 |
| C    | 5.687414  | 5.948652  | -1.06641 |
| H    | 6.708798  | 5.897258  | -1.44904 |
| H    | 5.019494  | 6.07538   | -1.92508 |
| H    | 5.600222  | 6.84752   | -0.45089 |
| C    | 2.777126  | 3.638153  | 2.357545 |
| H    | 2.251815  | 2.68318   | 2.428323 |
| H    | 3.166861  | 3.872065  | 3.354179 |
| H    | 2.046428  | 4.408608  | 2.102222 |
| S    | 0.127797  | -0.088708 | 0.137035 |
| C    | 1.088123  | -1.483565 | -0.27498 |
| C    | -1.34096  | -1.008053 | -0.26347 |
| C    | 0.240626  | -2.493947 | -0.69333 |
| C    | 2.525757  | -1.483101 | -0.20107 |



|            |           |           |          |
|------------|-----------|-----------|----------|
| C          | -2.675967 | -0.44955  | -0.12746 |
| C          | -6.772669 | 1.225308  | -0.24577 |
| C          | -9.174747 | 1.722219  | -0.28563 |
| C          | -8.339583 | 2.766003  | -0.56439 |
| S          | -8.264161 | 0.286747  | 0.012454 |
| H          | -8.656002 | 3.773521  | -0.80031 |
| H          | -10.25369 | 1.715994  | -0.257   |
| H          | 9.185667  | -0.718982 | -0.11742 |
| H          | 9.736151  | -3.278667 | -0.27046 |
| H          | 3.030794  | 0.610789  | -0.07962 |
| H          | 0.577945  | -3.459605 | -1.04839 |
| H          | 4.36422   | 1.520424  | 1.717282 |
| H          | 6.883239  | 3.497857  | -1.13518 |
| H          | 3.700961  | 5.640657  | 0.764615 |
| H          | 7.540709  | 1.319313  | -0.11955 |
| N          | -1.082404 | -2.225727 | -0.67976 |
| C          | -4.469245 | -4.780771 | 0.901219 |
| H          | -4.94482  | -5.027041 | 1.856379 |
| H          | -4.888029 | -5.458742 | 0.150598 |
| H          | -3.398087 | -4.957512 | 0.979913 |
| C          | -7.245809 | -3.711115 | 0.428883 |
| H          | -7.200867 | -4.496955 | -0.33195 |
| H          | -7.304098 | -4.211754 | 1.400512 |
| H          | -8.149757 | -3.123816 | 0.277761 |
| N          | -7.010105 | 2.480238  | -0.53792 |
| <b>p06</b> |           |           |          |
| C          | 1.011304  | 4.368437  | -0.33243 |
| C          | -0.050543 | 3.368063  | -0.21675 |
| C          | 0.248266  | 1.962656  | -0.09533 |
| C          | 1.635728  | 1.657513  | -0.09365 |
| C          | 2.671158  | 2.666819  | -0.18472 |
| C          | 2.36672   | 4.012145  | -0.31253 |
| N          | -1.270576 | 3.920034  | -0.24815 |
| N          | 0.548492  | 5.625813  | -0.44403 |
| S          | -1.07773  | 5.53388   | -0.40655 |
| N          | 3.986526  | 2.299306  | -0.10117 |
| N          | 2.008901  | 0.352174  | -0.04939 |
| C          | 4.311937  | 1.033455  | 0.001825 |
| C          | 3.271127  | 0.00822   | -0.0379  |
| C          | -0.788984 | 0.96031   | 0.002585 |
| C          | -2.167265 | 1.181072  | 0.020081 |
| C          | -2.920924 | 0.007502  | 0.139998 |
| C          | -2.126505 | -1.134862 | 0.208704 |
| S          | -0.441989 | -0.792727 | 0.124978 |
| C          | -2.990726 | -2.273541 | 0.318448 |
| C          | -4.323665 | -1.853785 | 0.311112 |

|            |           |           |          |
|------------|-----------|-----------|----------|
| C          | -4.348964 | -0.379529 | 0.18188  |
| C          | -5.368251 | 0.508844  | 0.140248 |
| S          | -2.835575 | -3.975106 | 0.557365 |
| C          | -4.573037 | -4.130657 | 0.667824 |
| C          | -5.22284  | -2.934948 | 0.526091 |
| C          | -8.749179 | -0.924934 | -0.80516 |
| C          | -7.368999 | -0.753512 | -0.71311 |
| C          | -6.813209 | 0.278465  | 0.059405 |
| C          | -7.68061  | 1.162525  | 0.718007 |
| C          | -9.065161 | 1.001453  | 0.661717 |
| C          | -9.582253 | -0.047607 | -0.10236 |
| C          | -9.338529 | -2.009066 | -1.67666 |
| C          | -9.981684 | 1.927357  | 1.425609 |
| H          | -10.16519 | -2.518341 | -1.17403 |
| H          | -9.73291  | -1.591563 | -2.60909 |
| H          | -8.590055 | -2.758232 | -1.94204 |
| H          | -7.261549 | 1.980127  | 1.296725 |
| H          | -6.712425 | -1.401285 | -1.28128 |
| H          | -6.297575 | -2.846182 | 0.583268 |
| H          | -5.002712 | -5.107468 | 0.827238 |
| H          | -2.574301 | 2.176717  | -0.04937 |
| H          | 3.150713  | 4.753072  | -0.37479 |
| H          | -10.65933 | -0.174863 | -0.16636 |
| H          | -9.546802 | 2.924366  | 1.526168 |
| H          | -10.95023 | 2.027842  | 0.930572 |
| H          | -10.16765 | 1.548078  | 2.436282 |
| H          | -5.08198  | 1.557893  | 0.176203 |
| C          | 5.742156  | 0.75501   | 0.188279 |
| C          | 6.751131  | 1.62168   | -0.15343 |
| C          | 8.133735  | 0.063087  | 0.925776 |
| C          | 8.062039  | 1.237672  | 0.235564 |
| H          | 6.530149  | 2.544234  | -0.67351 |
| H          | 9.016758  | -0.420534 | 1.316074 |
| H          | 8.937102  | 1.832999  | 0.004919 |
| C          | 3.551174  | -1.440903 | -0.08877 |
| C          | 3.157539  | -2.386601 | 0.815769 |
| C          | 4.074454  | -3.900839 | -0.73195 |
| C          | 3.459501  | -3.738822 | 0.471391 |
| H          | 2.651119  | -2.112534 | 1.733168 |
| H          | 4.389498  | -4.82346  | -1.19548 |
| H          | 3.214369  | -4.573138 | 1.117222 |
| Se         | 4.359702  | -2.264631 | -1.59551 |
| Se         | 6.455135  | -0.732188 | 1.129366 |
| <b>p07</b> |           |           |          |
| C          | -1.78953  | 3.3252    | 0.088399 |
| C          | -0.685785 | 2.370174  | -0.01716 |

|   |           |           |          |
|---|-----------|-----------|----------|
| C | -2.231609 | 0.550896  | 0.034987 |
| C | -3.326754 | 1.504252  | 0.028942 |
| C | -3.160476 | 2.907046  | 0.069361 |
| N | 0.514765  | 2.960467  | -0.01454 |
| N | -1.357273 | 4.591099  | 0.166187 |
| S | 0.271441  | 4.567444  | 0.11287  |
| N | -4.592576 | 1.013679  | -0.08109 |
| N | -2.519105 | -0.757855 | 0.239312 |
| C | -4.838688 | -0.267502 | -0.02633 |
| C | -3.759276 | -1.191772 | 0.294875 |
| C | 4.942737  | -0.59672  | -0.20383 |
| C | 6.1855    | -1.266054 | -0.14214 |
| C | 6.042837  | -2.652042 | -0.24011 |
| S | 4.397131  | -3.144229 | -0.3632  |
| C | 7.342275  | -3.260858 | -0.2891  |
| C | 8.302796  | -2.258783 | -0.22938 |
| C | 7.632419  | -0.945775 | -0.11972 |
| C | 8.296598  | 0.231459  | -0.05851 |
| S | 8.044667  | -4.834543 | -0.3843  |
| C | 9.648709  | -4.135341 | -0.34299 |
| C | 9.627231  | -2.769923 | -0.25532 |
| C | 8.000906  | 3.972186  | -0.33319 |
| C | 8.427132  | 2.658238  | -0.50342 |
| C | 7.787713  | 1.589797  | 0.148967 |
| C | 6.732983  | 1.875121  | 1.025604 |
| C | 6.292042  | 3.185644  | 1.225643 |
| C | 6.929977  | 4.217561  | 0.53484  |
| C | 8.666435  | 5.109881  | -1.07016 |
| H | 9.629559  | 4.80672   | -1.48545 |
| H | 8.042766  | 5.457386  | -1.90055 |
| H | 8.835594  | 5.965533  | -0.41108 |
| C | 5.144611  | 3.471329  | 2.16557  |
| H | 4.185633  | 3.207603  | 1.70718  |
| H | 5.232078  | 2.890835  | 3.087535 |
| H | 5.103903  | 4.528852  | 2.434086 |
| S | 1.894275  | 0.45794   | 0.077637 |
| C | 2.46272   | -1.132079 | -0.3753  |
| C | 0.216686  | 0.033503  | -0.27525 |
| C | 1.406619  | -1.925097 | -0.78884 |
| C | 0.163012  | -1.277756 | -0.73225 |
| C | 3.863297  | -1.453526 | -0.31753 |
| C | -0.877586 | 0.958029  | -0.09537 |
| C | -4.263605 | 3.855779  | 0.072275 |
| C | -6.4757   | 5.034422  | -0.00806 |
| C | -4.181552 | 5.235389  | 0.195219 |
| C | -5.428988 | 5.898701  | 0.150976 |

|            |           |           |          |
|------------|-----------|-----------|----------|
| S          | -5.961958 | 3.388108  | -0.10321 |
| H          | -3.239414 | 5.743698  | 0.313899 |
| H          | -5.539294 | 6.971994  | 0.233398 |
| H          | -7.527985 | 5.267728  | -0.0784  |
| H          | 10.528865 | -2.173001 | -0.21471 |
| H          | 10.504978 | -4.789965 | -0.38898 |
| H          | 4.820403  | 0.476399  | -0.19391 |
| H          | 1.5356    | -2.935767 | -1.15409 |
| H          | -0.762285 | -1.737679 | -1.03794 |
| H          | 6.278931  | 1.068536  | 1.588714 |
| H          | 9.263797  | 2.448906  | -1.16282 |
| H          | 6.598345  | 5.240517  | 0.688632 |
| H          | 9.374629  | 0.173282  | -0.19461 |
| C          | -6.223674 | -0.684239 | -0.31912 |
| C          | -7.362991 | -0.272    | 0.31337  |
| C          | -8.451097 | -1.507932 | -1.36531 |
| C          | -8.587901 | -0.738777 | -0.25032 |
| H          | -7.32147  | 0.366929  | 1.186647 |
| H          | -9.231969 | -1.96133  | -1.95691 |
| H          | -9.554443 | -0.49631  | 0.174222 |
| C          | -3.942663 | -2.56728  | 0.765703 |
| C          | -2.915822 | -3.456538 | 0.988044 |
| C          | -4.609034 | -4.838976 | 1.83944  |
| C          | -3.279971 | -4.702154 | 1.560874 |
| H          | -1.894082 | -3.18775  | 0.757292 |
| H          | -5.108088 | -5.69265  | 2.273278 |
| H          | -2.55685  | -5.481599 | 1.7681   |
| Se         | -6.655009 | -1.742766 | -1.83521 |
| Se         | -5.585697 | -3.323911 | 1.349743 |
| <b>p08</b> |           |           |          |
| C          | -2.175324 | 3.114629  | -0.19102 |
| C          | -0.995658 | 2.253132  | -0.23893 |
| C          | -2.370714 | 0.313357  | -0.02462 |
| C          | -3.545198 | 1.165552  | -0.08315 |
| C          | -3.504661 | 2.577667  | -0.1633  |
| N          | 0.149104  | 2.941544  | -0.28564 |
| N          | -1.853547 | 4.414989  | -0.20639 |
| S          | -0.228587 | 4.52972   | -0.26933 |
| N          | -4.765112 | 0.560452  | -0.12408 |
| N          | -2.538606 | -0.994092 | 0.287562 |
| C          | -4.897727 | -0.728837 | 0.041822 |
| C          | -3.736159 | -1.525301 | 0.407562 |
| C          | 5.009686  | -0.529879 | -0.21478 |
| C          | 6.261972  | -1.176825 | -0.29676 |
| C          | 6.138725  | -2.517342 | -0.67118 |
| S          | 4.501736  | -2.998143 | -0.89788 |

|    |           |           |          |
|----|-----------|-----------|----------|
| C  | 7.44568   | -3.084899 | -0.84123 |
| C  | 8.392864  | -2.101519 | -0.58264 |
| C  | 7.70473   | -0.847861 | -0.20845 |
| C  | 8.353393  | 0.300969  | 0.090971 |
| S  | 8.169146  | -4.597442 | -1.25161 |
| C  | 9.763557  | -3.897908 | -1.07256 |
| C  | 9.723805  | -2.578152 | -0.71252 |
| C  | 7.988732  | 4.012953  | 0.595842 |
| C  | 8.436609  | 2.769832  | 0.153585 |
| C  | 7.827962  | 1.578424  | 0.580045 |
| C  | 6.783649  | 1.655221  | 1.512704 |
| C  | 6.329872  | 2.885449  | 1.990398 |
| C  | 6.933389  | 4.052105  | 1.512884 |
| C  | 8.611609  | 5.289963  | 0.084263 |
| H  | 9.618192  | 5.115782  | -0.3017  |
| H  | 8.016238  | 5.716941  | -0.72992 |
| H  | 8.675801  | 6.045222  | 0.871437 |
| C  | 5.239813  | 2.952362  | 3.033949 |
| H  | 4.563684  | 2.097864  | 2.96257  |
| H  | 5.665313  | 2.950843  | 4.043347 |
| H  | 4.646168  | 3.86354   | 2.930989 |
| C  | 2.536205  | -1.057004 | -0.48497 |
| C  | 0.119597  | 0.010086  | -0.35705 |
| C  | 1.47633   | -1.915299 | -0.70507 |
| C  | 0.193049  | -1.345754 | -0.63855 |
| C  | 3.937689  | -1.360059 | -0.49613 |
| C  | -1.057479 | 0.826869  | -0.21641 |
| C  | -4.687947 | 3.41383   | -0.23567 |
| C  | -7.056705 | 4.497747  | -0.44956 |
| C  | -4.740006 | 4.795574  | -0.22507 |
| C  | -6.026465 | 5.383655  | -0.33922 |
| Se | 1.89646   | 0.708657  | -0.19707 |
| Se | -6.465355 | 2.720184  | -0.40616 |
| H  | 1.620475  | -2.967738 | -0.92148 |
| H  | -0.701309 | -1.925389 | -0.80333 |
| H  | -3.843179 | 5.387829  | -0.13515 |
| H  | -6.168299 | 6.458071  | -0.33899 |
| H  | -8.107447 | 4.729539  | -0.54974 |
| H  | 4.87463   | 0.511705  | 0.038514 |
| H  | 10.617539 | -1.989091 | -0.55407 |
| H  | 10.628599 | -4.517651 | -1.24997 |
| H  | 9.261531  | 2.718744  | -0.55051 |
| H  | 6.349257  | 0.740661  | 1.89837  |
| H  | 6.583423  | 5.014551  | 1.875475 |
| H  | 9.43135   | 0.28781   | -0.05712 |
| C  | -3.791543 | -2.869512 | 0.985292 |



|            |           |           |          |
|------------|-----------|-----------|----------|
| C          | -2.697802 | -3.671633 | 1.230925 |
| S          | -5.238798 | -3.623818 | 1.637255 |
| C          | -3.011387 | -4.873248 | 1.906397 |
| H          | -1.699197 | -3.372826 | 0.947628 |
| C          | -4.342921 | -5.000844 | 2.209515 |
| H          | -2.276947 | -5.623885 | 2.170186 |
| C          | -6.244058 | -1.2922   | -0.17307 |
| C          | -7.414046 | -0.933909 | 0.440751 |
| S          | -6.552314 | -2.464914 | -1.43813 |
| C          | -8.551304 | -1.616782 | -0.07177 |
| H          | -7.448651 | -0.207768 | 1.241573 |
| C          | -8.262028 | -2.477835 | -1.09499 |
| H          | -9.556842 | -1.473386 | 0.303336 |
| C          | -5.029275 | -6.128662 | 2.917144 |
| H          | -5.537194 | -5.789579 | 3.824912 |
| H          | -5.778233 | -6.611098 | 2.281804 |
| H          | -4.296074 | -6.88438  | 3.205169 |
| C          | -9.20249  | -3.342295 | -1.87835 |
| H          | -9.195623 | -3.088609 | -2.94252 |
| H          | -8.950086 | -4.40305  | -1.79017 |
| H          | -10.22063 | -3.20688  | -1.50841 |
| <b>p16</b> |           |           |          |
| C          | -2.943265 | 3.65388   | 0.123329 |
| C          | -1.771268 | 2.782665  | 0.073732 |
| C          | -1.897897 | 1.343879  | 0.029785 |
| C          | -3.242752 | 0.870358  | 0.038245 |
| C          | -4.400639 | 1.7688    | 0.087802 |
| C          | -4.249743 | 3.140511  | 0.130013 |
| N          | -0.626835 | 3.476594  | 0.07482  |
| N          | -2.635787 | 4.960604  | 0.160071 |
| S          | -1.010128 | 5.062619  | 0.133493 |
| N          | -5.692361 | 1.267442  | 0.09409  |
| N          | -3.43277  | -0.477279 | -0.00181 |
| C          | -5.78218  | -0.022169 | 0.053568 |
| C          | -4.661388 | -0.897508 | 0.005751 |
| C          | -5.155555 | -2.307001 | -0.03103 |
| C          | -7.028447 | -0.865782 | 0.04806  |
| N          | -6.560635 | -2.189749 | -0.00282 |
| O          | -8.186624 | -0.540564 | 0.078842 |
| O          | -4.541838 | -3.342952 | -0.07499 |
| C          | -7.45496  | -3.335956 | -0.02431 |
| C          | -0.751929 | 0.472058  | -0.01756 |
| C          | 0.593459  | 0.861551  | -0.02138 |
| C          | 1.485324  | -0.209611 | -0.08174 |
| C          | 0.836047  | -1.446325 | -0.11535 |
| S          | -0.878015 | -1.315658 | -0.08002 |

|            |           |           |          |
|------------|-----------|-----------|----------|
| C          | 1.832534  | -2.470968 | -0.16817 |
| C          | 3.105412  | -1.888797 | -0.1579  |
| C          | 2.949963  | -0.419586 | -0.09095 |
| C          | 3.85266   | 0.588107  | -0.08358 |
| S          | 1.890764  | -4.187427 | -0.33384 |
| C          | 3.634137  | -4.130006 | -0.40769 |
| C          | 4.13315   | -2.859035 | -0.30864 |
| C          | 7.373514  | -0.369821 | 0.946097 |
| C          | 5.983748  | -0.374538 | 0.841277 |
| C          | 5.313599  | 0.540954  | 0.014367 |
| C          | 6.071252  | 1.49012   | -0.68736 |
| C          | 7.464647  | 1.502984  | -0.61957 |
| C          | 8.098605  | 0.566193  | 0.20022  |
| C          | 8.08613   | -1.329017 | 1.870297 |
| C          | 8.268584  | 2.493075  | -1.42812 |
| H          | -8.102682 | -3.293493 | -0.90191 |
| H          | -8.079983 | -3.343728 | 0.870489 |
| H          | -6.839663 | -4.233128 | -0.05793 |
| H          | 8.92934   | -1.811526 | 1.368311 |
| H          | 8.485671  | -0.80695  | 2.745809 |
| H          | 7.414081  | -2.110539 | 2.229746 |
| H          | 5.560174  | 2.21921   | -1.30873 |
| H          | 5.405967  | -1.067448 | 1.44098  |
| H          | 5.19021   | -2.643162 | -0.3515  |
| H          | 4.183703  | -5.052083 | -0.51833 |
| H          | 0.874503  | 1.901252  | 0.017398 |
| H          | -5.115179 | 3.786363  | 0.166447 |
| H          | 9.182497  | 0.576074  | 0.27431  |
| H          | 7.710475  | 3.416837  | -1.5962  |
| H          | 9.205654  | 2.748511  | -0.92833 |
| H          | 8.522757  | 2.080738  | -2.41056 |
| H          | 3.440523  | 1.59127   | -0.17076 |
| <b>p18</b> |           |           |          |
| C          | -3.40641  | 2.192734  | -0.02131 |
| C          | -2.187157 | 1.385784  | -0.01007 |
| C          | -3.478145 | -0.625745 | -0.02738 |
| C          | -4.70261  | 0.191222  | -0.03693 |
| C          | -4.71414  | 1.606195  | -0.03639 |
| N          | -1.078007 | 2.129503  | 0.00565  |
| N          | -3.143129 | 3.506436  | -0.01455 |
| S          | -1.525839 | 3.695139  | 0.003934 |
| N          | -5.92739  | -0.421806 | -0.04772 |
| N          | -3.579751 | -1.987364 | -0.02893 |
| C          | -5.948251 | -1.716042 | -0.04901 |
| C          | -4.771666 | -2.498456 | -0.03952 |
| C          | -5.15863  | -3.943874 | -0.04339 |

|   |           |           |          |
|---|-----------|-----------|----------|
| C | -7.130649 | -2.640195 | -0.05912 |
| N | -6.567801 | -3.929898 | -0.05502 |
| O | -8.310103 | -2.398884 | -0.06871 |
| O | -4.466228 | -4.930102 | -0.03844 |
| C | -7.376891 | -5.138071 | -0.06261 |
| C | 3.830083  | -0.534242 | -0.01304 |
| C | 5.175191  | -0.952815 | 0.031998 |
| C | 5.292658  | -2.347068 | 0.05637  |
| S | 3.768698  | -3.145188 | 0.05851  |
| C | 6.678863  | -2.706841 | -0.00738 |
| C | 7.435742  | -1.542532 | -0.08064 |
| C | 6.536111  | -0.371034 | -0.04464 |
| C | 6.967296  | 0.909541  | -0.11434 |
| S | 7.660502  | -4.126707 | -0.00915 |
| C | 9.103432  | -3.14263  | -0.10905 |
| C | 8.830242  | -1.801675 | -0.13368 |
| C | 5.941819  | 4.486427  | -0.67328 |
| C | 6.606285  | 3.266617  | -0.76334 |
| C | 6.216221  | 2.161125  | 0.012113 |
| C | 5.168091  | 2.320693  | 0.927795 |
| C | 4.492419  | 3.537336  | 1.04972  |
| C | 4.885744  | 4.6035    | 0.238712 |
| H | -8.003859 | -5.167508 | -0.95562 |
| H | -8.021507 | -5.166594 | 0.817756 |
| H | -6.698034 | -5.988853 | -0.05551 |
| C | 6.339099  | 5.65695   | -1.5405  |
| H | 7.32343   | 5.505873  | -1.98789 |
| H | 5.623297  | 5.800654  | -2.3567  |
| H | 6.367004  | 6.586347  | -0.96563 |
| C | 3.357794  | 3.686278  | 2.035802 |
| H | 2.442874  | 3.218898  | 1.656229 |
| H | 3.593935  | 3.205948  | 2.988655 |
| H | 3.136384  | 4.7372    | 2.232313 |
| S | 0.649068  | -0.0026   | 0.007413 |
| C | 1.493015  | -1.532827 | -0.00282 |
| C | -0.939934 | -0.798939 | -0.01274 |
| C | 0.590567  | -2.585774 | -0.01942 |
| C | -0.746579 | -2.182493 | -0.02446 |
| C | 2.925511  | -1.583998 | 0.004613 |
| C | -2.174952 | -0.048549 | -0.01656 |
| C | -5.928857 | 2.407475  | -0.04963 |
| C | -8.269348 | 3.303024  | -0.07358 |
| C | -6.012235 | 3.794741  | -0.0543  |
| C | -7.331179 | 4.298148  | -0.06784 |
| S | -7.564988 | 1.72839   | -0.06298 |
| H | -5.137067 | 4.421779  | -0.04804 |

|            |           |           |          |
|------------|-----------|-----------|----------|
| H          | -7.569236 | 5.353576  | -0.07317 |
| H          | -9.344946 | 3.401693  | -0.08377 |
| H          | 9.60521   | -1.048703 | -0.18925 |
| H          | 10.065502 | -3.629622 | -0.1445  |
| H          | 3.508839  | 0.495594  | -0.06645 |
| H          | 0.891078  | -3.625475 | -0.03034 |
| H          | -1.574201 | -2.87015  | -0.03754 |
| H          | 4.906006  | 1.497962  | 1.582383 |
| H          | 7.436246  | 3.159804  | -1.45497 |
| H          | 4.37103   | 5.555632  | 0.331166 |
| H          | 8.030861  | 1.041263  | -0.30264 |
| <b>p19</b> |           |           |          |
| C          | -3.31978  | 2.092269  | -0.13461 |
| C          | -2.054615 | 1.363132  | -0.11231 |
| C          | -3.213571 | -0.725744 | -0.02213 |
| C          | -4.486481 | 0.01325   | -0.04365 |
| C          | -4.58896  | 1.424853  | -0.10032 |
| N          | -0.993358 | 2.171582  | -0.15037 |
| N          | -3.138109 | 3.418382  | -0.18899 |
| S          | -1.535708 | 3.708424  | -0.21    |
| N          | -5.669155 | -0.676171 | -0.0079  |
| N          | -3.228034 | -2.088935 | 0.033352 |
| C          | -5.608756 | -1.968897 | 0.044063 |
| C          | -4.385727 | -2.674609 | 0.064652 |
| C          | -4.681619 | -4.13983  | 0.126157 |
| C          | -6.731015 | -2.963279 | 0.092101 |
| N          | -6.089889 | -4.213774 | 0.13865  |
| O          | -7.923146 | -2.79248  | 0.093299 |
| O          | -3.929882 | -5.080782 | 0.159232 |
| C          | -6.821629 | -5.469103 | 0.194586 |
| C          | 4.254615  | -0.470811 | -0.00751 |
| C          | 5.588431  | -0.922505 | 0.009549 |
| C          | 5.67231   | -2.319713 | -0.0277  |
| S          | 4.130736  | -3.081138 | -0.05229 |
| C          | 7.048616  | -2.708679 | -0.11685 |
| C          | 7.8332    | -1.560531 | -0.14481 |
| C          | 6.962635  | -0.370686 | -0.04986 |
| C          | 7.424419  | 0.900821  | -0.06386 |
| S          | 7.995566  | -4.150277 | -0.18799 |
| C          | 9.460975  | -3.197439 | -0.25559 |
| C          | 9.220463  | -1.850384 | -0.21957 |
| C          | 6.476813  | 4.522093  | -0.44745 |
| C          | 7.109413  | 3.292664  | -0.60341 |
| C          | 6.705462  | 2.162939  | 0.129754 |
| C          | 5.677814  | 2.305703  | 1.070164 |
| C          | 5.03733   | 3.533254  | 1.261622 |

|    |           |           |          |
|----|-----------|-----------|----------|
| C  | 5.44096   | 4.623799  | 0.490186 |
| H  | -7.460461 | -5.573712 | -0.68425 |
| H  | -7.448039 | -5.502007 | 1.087858 |
| H  | -6.090572 | -6.275041 | 0.222092 |
| C  | 6.884518  | 5.719965  | -1.27129 |
| H  | 7.850938  | 5.561781  | -1.75384 |
| H  | 6.150668  | 5.92231   | -2.0585  |
| H  | 6.956463  | 6.620277  | -0.65535 |
| C  | 3.944615  | 3.669833  | 2.295799 |
| H  | 3.102372  | 3.00718   | 2.074736 |
| H  | 4.309992  | 3.405304  | 3.292528 |
| H  | 3.564025  | 4.691947  | 2.33925  |
| C  | 1.894162  | -1.411172 | -0.02758 |
| C  | -0.666012 | -0.722428 | -0.04054 |
| C  | 0.978005  | -2.448541 | 0.010345 |
| C  | -0.373677 | -2.084062 | 0.004143 |
| C  | 3.321201  | -1.497048 | -0.02973 |
| C  | -1.948653 | -0.066335 | -0.05681 |
| C  | -5.852938 | 2.137194  | -0.12189 |
| C  | -8.321564 | 2.990674  | -0.14096 |
| C  | -6.035307 | 3.509234  | -0.17818 |
| C  | -7.374858 | 3.971833  | -0.18854 |
| Se | 0.98997   | 0.256593  | -0.086   |
| Se | -7.566946 | 1.279159  | -0.07457 |
| H  | 1.280956  | -3.488522 | 0.048526 |
| H  | -1.163644 | -2.816328 | 0.034453 |
| H  | -5.196434 | 4.185553  | -0.21233 |
| H  | -7.617733 | 5.02698   | -0.23127 |
| H  | -9.394319 | 3.121599  | -0.13928 |
| H  | 3.961158  | 0.568961  | -0.00746 |
| H  | 10.013169 | -1.114579 | -0.24804 |
| H  | 10.410773 | -3.705211 | -0.3195  |
| H  | 7.922865  | 3.196363  | -1.31586 |
| H  | 5.404606  | 1.459473  | 1.689672 |
| H  | 4.950607  | 5.582403  | 0.633313 |
| H  | 8.489559  | 1.015767  | -0.25433 |

---
